# Supplementary material
Source: publisher figshare collection journal article supplement (https://sage.figshare.com/ndownloader/files/21599565)
Supplement: Supplementary file 1 [file 21599565]

**Table S1**. Statisticsa of seasonally averaged discharge at Salekhard, 1937-2009. Neither skew value is significant at α=0.05. Both series are significantly autocorrelated at α=0.05 at a lag of 1 year.

| Season | Mean | Median | Std | Skew | r1 | Min | Max |
| --- | --- | --- | --- | --- | --- | --- | --- |
| Sep-Aug  May-Aug | 12770  24987 | 12565  24836 | 1787  3800 | 0.19  0.36 | 0.41**  0.33** | 9563  16255 | 16812  34827 |

aSkew and lag-1 autocorrelation (r1) are dimensionless.

All other statistics (Std=standard deviation) are in units of m3/sec.
